# Supplementary material for: Identification of a common mesenchymal stromal progenitor for the adult haematopoietic niche
Source: PubMed Central journal article supplement (PMC5062560; doi:10.1038/ncomms13095), 2016-10-10
Supplement: ncomms13095-s1.pdf [file ncomms13095-s1.pdf]

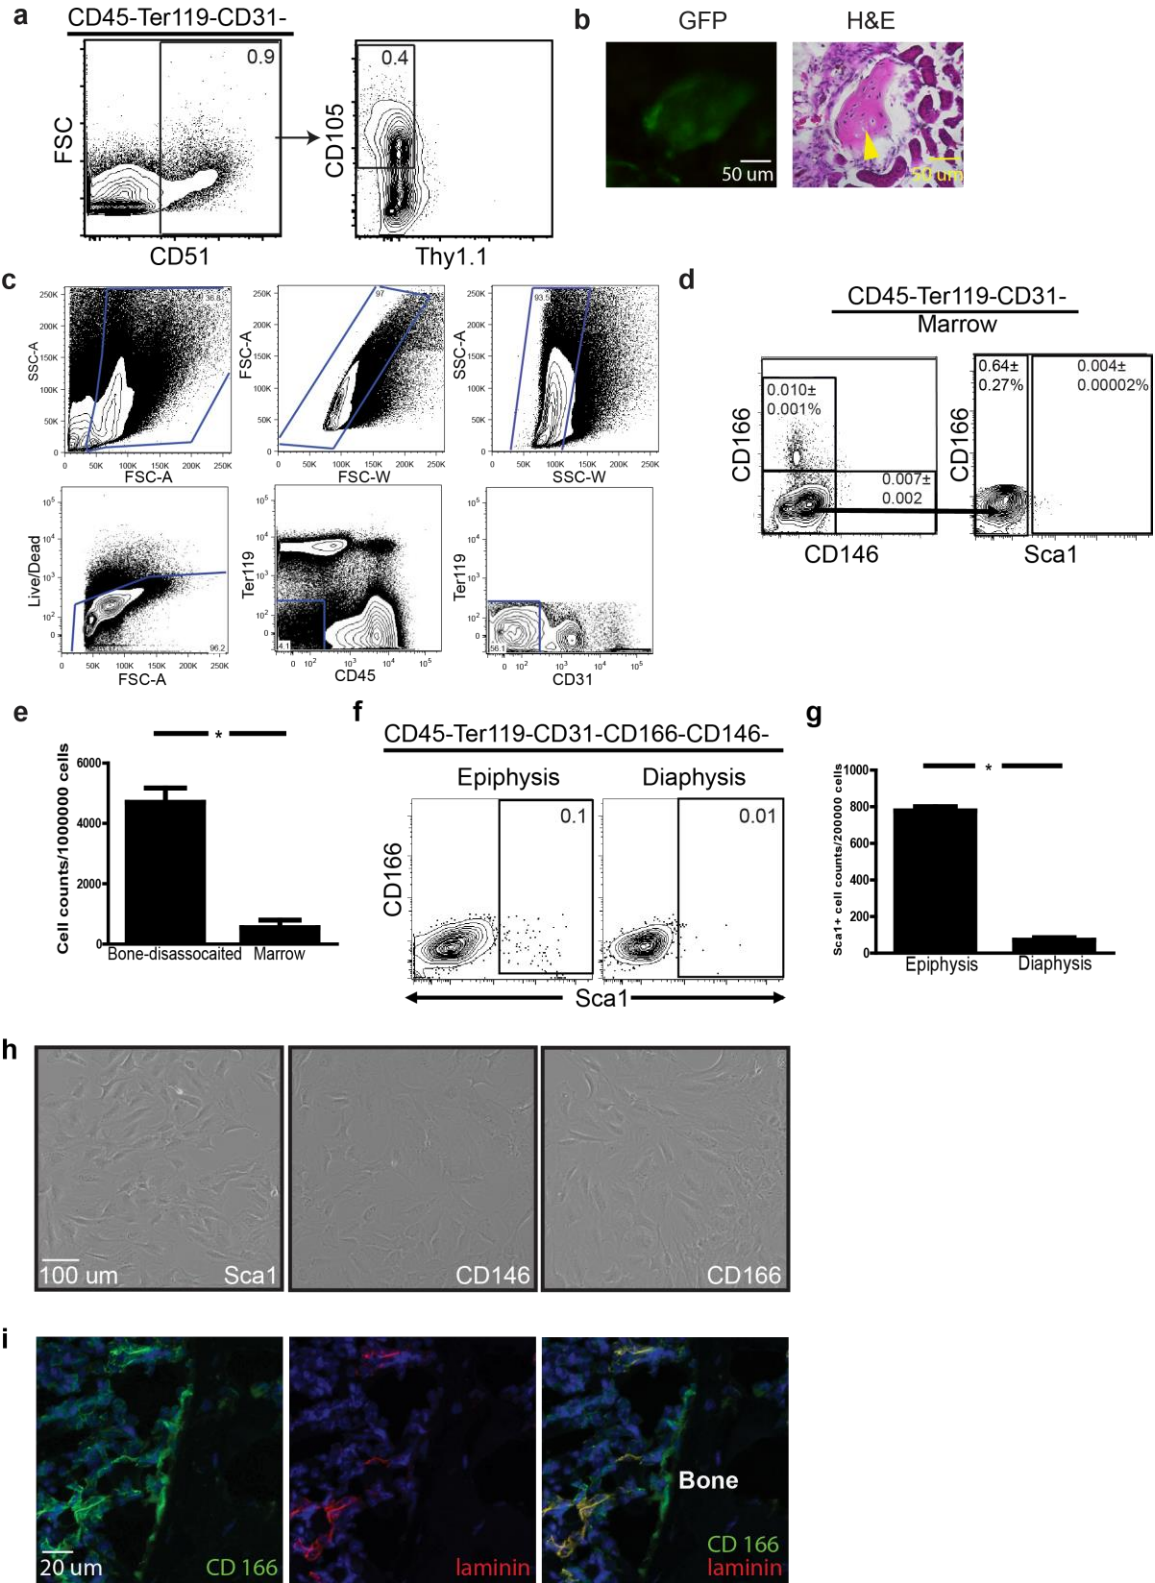

**Supplementary Figure 1. Adult mesenchymal progenitors can not initiate niche formation and most Sca1<sup>+</sup> cells localize to the epiphysis.** (a) Representative FACS profiles of stromal

cells (CD45<sup>-</sup>Ter119<sup>-</sup>CD31<sup>-</sup>). They were separated based on the same markers that identified the fetal osteochondroprogenitors: CD51, CD105 and Thy1.1. The number shown in the gate is the percentage of total live cells. (b) GFP-labeled CD105<sup>+</sup>Thy1.1<sup>-</sup> adult progenitors one month after subrenal capsule transplant (left). A representative cross-section of the graft site was stained with H&E (right; arrowhead points to bone). (c) Representative gating used to isolate the Ter119<sup>-</sup>CD45<sup>-</sup>CD31<sup>-</sup> stromal cells (d) Representative FACS profiles of stromal cells (CD45<sup>-</sup>Ter119<sup>-</sup>CD31<sup>-</sup>) from the marrow compartment (e) Sca1<sup>+</sup> cell distributions within bone-disassociated and marrow fractions (\*:P<0.05, n=6, student's t-test). (f) Representative FACS analysis of Sca1<sup>+</sup> frequency in stromal cells from the diaphysis and epiphysis that were pre-gated for CD45<sup>-</sup>Ter119<sup>-</sup>CD31<sup>-</sup>CD166<sup>-</sup>CD146<sup>-</sup>. (g) Sca1<sup>+</sup> cell counts from the diaphysis and epiphysis (\*:P≤0.05, n=6, student's t-test). (h) Bright-field image of cultured mesenchymal progenitors. (i) Confocal image of cells stained with CD166<sup>+</sup> and laminin antibodies.

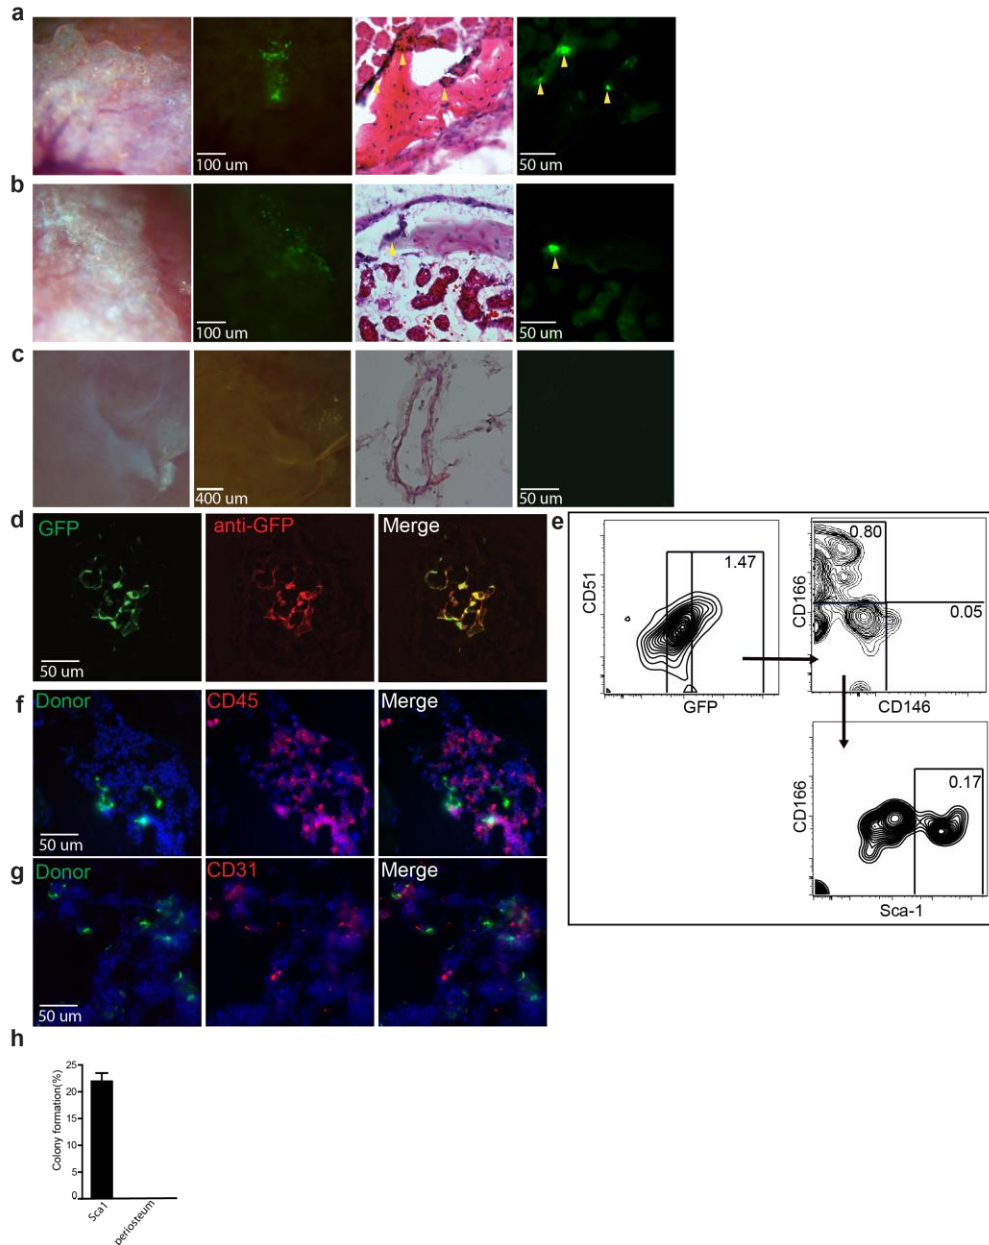

**Supplementary Figure 2. Sca1<sup>+</sup> progenitors did not generate progeny with hematopoietic or endothelial fate** (a-c) Bright field and GFP images of GFP-labeled adult progenitors (a) CD146<sup>+</sup> (b) CD166<sup>+</sup> (c) Sca1<sup>-</sup> mixed with fetal skeletal progenitors one month after transplant. Donor-derived GFP<sup>+</sup> cells can be clearly identified (far left and left). Representative cross sections of the graft site stained with H&E (right) or GFP (far right) to identify donor origin. (d) Cross section of a representative graft derived from GFP labeled Sca1<sup>+</sup> progenitors co-transplanted with fetal skeletal progenitors. GFP is shown in green and anti-GFP antibody staining is shown in red. (e) Representative gating for the GFP cells with the highest intensity of GFP. The percent of live cells is displayed. (f and g) GFP labeled Sca1<sup>+</sup> progenitors were co-transplanted with unmarked fetal skeletal progenitors under the kidney capsule. Engrafted bones were harvested one month later and sections were stained with an antibody to (f) CD45 or (g) CD31. (h) Cell colony forming efficiency of Sca1<sup>+</sup> bone-disassociated sorted cells and unsorted periosteum from the outer bone.

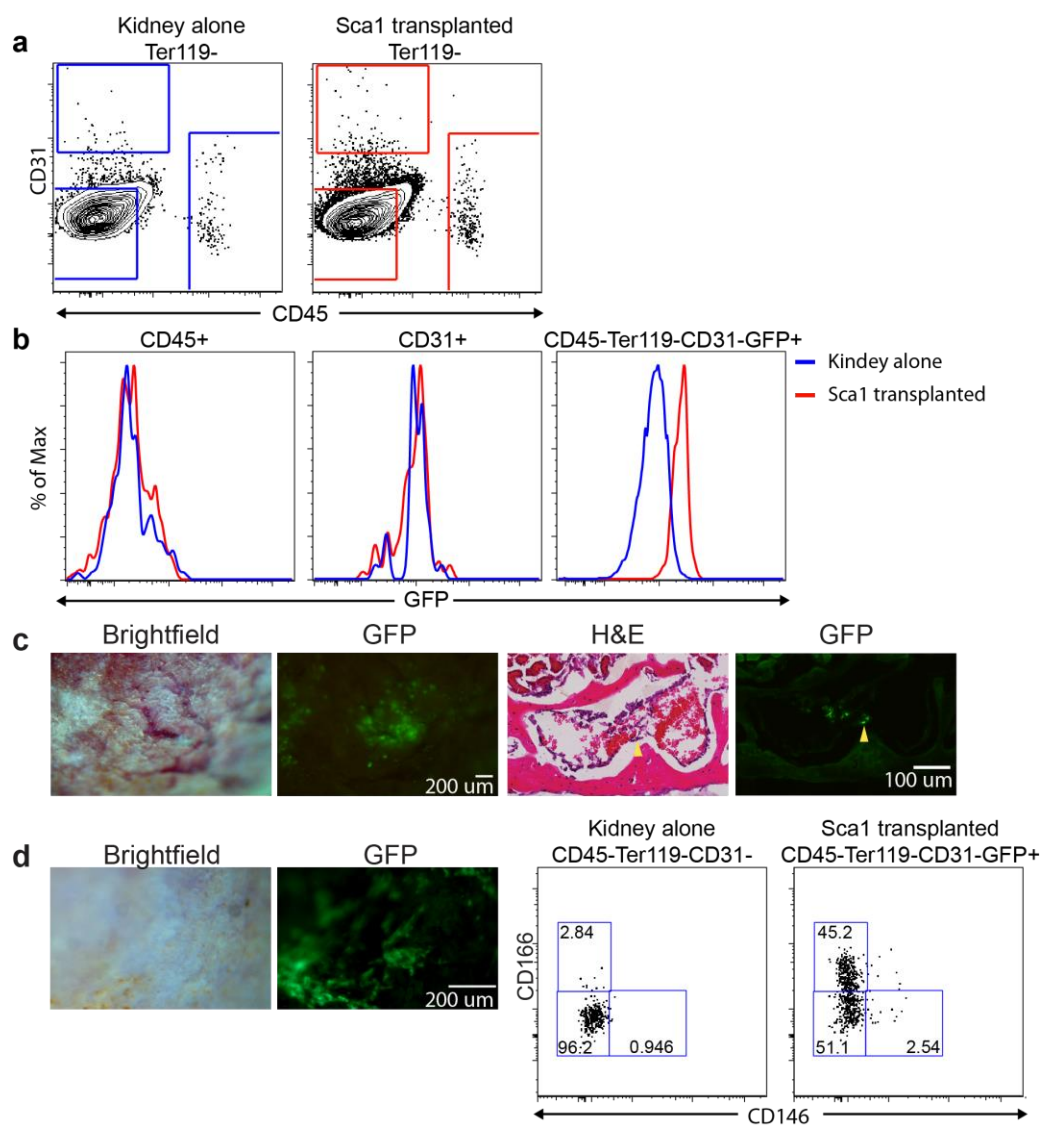

**Supplementary Figure 3. GFP is restricted to *Sca1*<sup>+</sup> transplanted cells and its progeny. A single *Sca1*<sup>+</sup>GFP<sup>+</sup> clone can give rise to multiple cell types.** (a) Representative FACS plots of a untransplanted kidney and a kidney transplanted with *Sca1*<sup>+</sup>GFP<sup>+</sup> cells, showing gating for stromal cells (CD45<sup>-</sup>Ter119<sup>-</sup>CD31<sup>+</sup>), hematopoietic cells (CD45<sup>+</sup>) and endothelial cells (CD31<sup>+</sup>). (b) Representative histogram of GFP expression in hematopoietic (CD45<sup>+</sup>), endothelial cells (CD31<sup>+</sup>) and stromal cells (CD45<sup>-</sup>Ter119<sup>-</sup>CD31<sup>+</sup>GFP<sup>+</sup>) from an untransplanted kidney (blue) and a kidney transplanted with *Sca1*<sup>+</sup>GFP<sup>+</sup> cells. (c) A single sorted *Sca1*<sup>+</sup> cell was expanded *in vitro* for two days then transplanted with unmarked fetal skeletal progenitors under the kidney capsule. Bright field and GFP images of GFP-labeled progenitors one month after transplant (far left and left). A representative cross section of the graft site was stained with H&E (right) or GFP to identify the donor origin (far right). Yellow arrows show donor-derived cells. (d) A single sorted *Sca1*<sup>+</sup> cell was expanded *in vitro* for 10 days then transplanted alone under the kidney capsule. Bright field and GFP images are shown (far left and left). Representative FACS analysis of the kidney from an untransplanted mouse and a kidney transplanted with the *Sca1*<sup>+</sup> clone (right and far right). Prominent CD166 and CD146 populations can be found in the *Sca1*<sup>+</sup> clone transplanted kidney (far right).



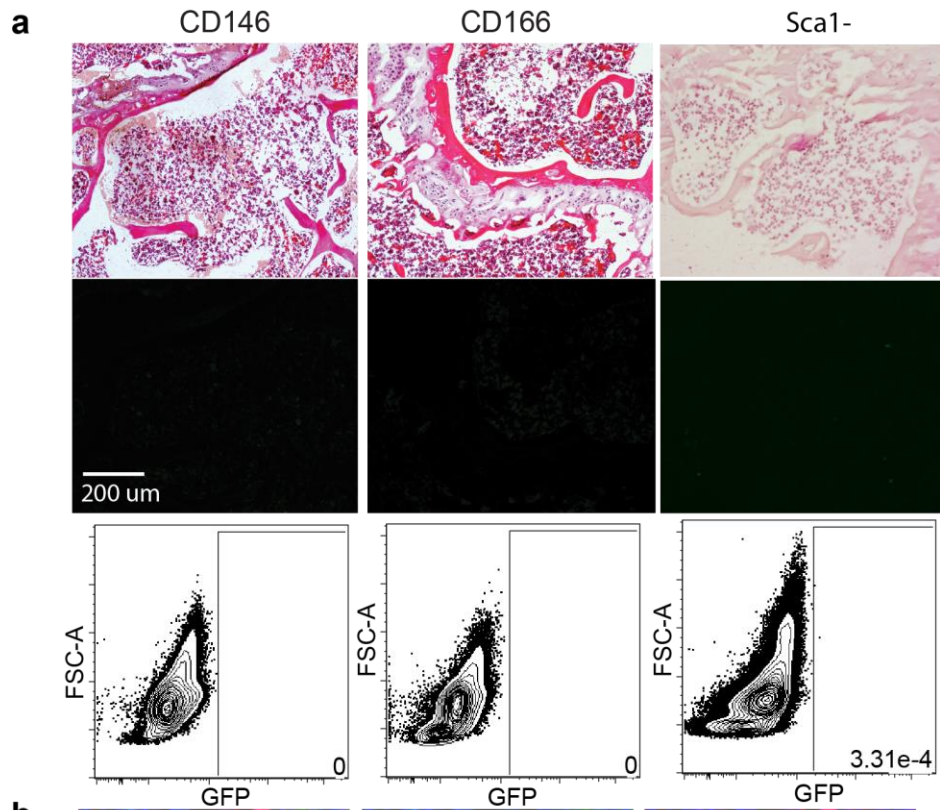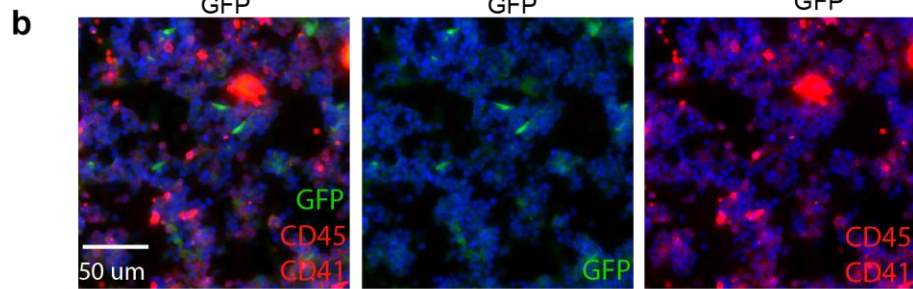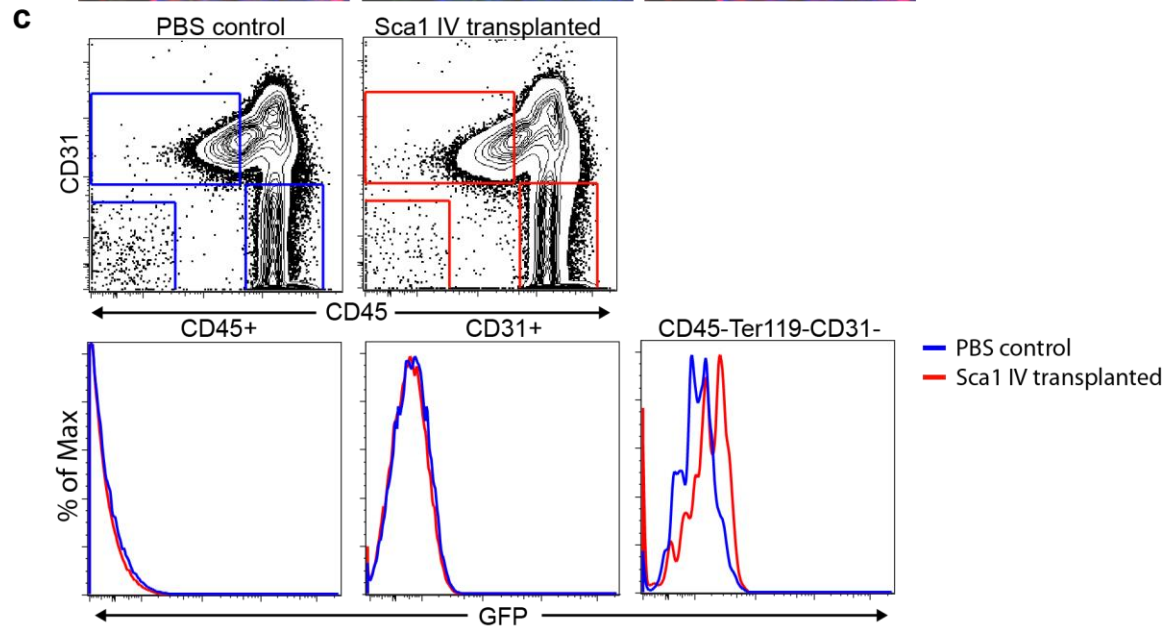

**Supplementary Figure 4. Sca1<sup>+</sup> progenitors retain GFP expression and do not give rise to hematopoietic or endothelial cells.** (a) Representative cross sections of the tibia stained with H&E (upper) or GFP (middle). Tibias were harvested one month after transplantation. Representative FACS analysis of GFP expression in femurs harvested one month after transplantation (lower). (b) Representative crosssection from mouse one month after IV transplantation of Sca1<sup>+</sup> cells stained with CD45 and CD41 antibodies (c) Representative FACS plots of a PBS control and mouse transplanted with Sca1<sup>+</sup>GFP<sup>+</sup> cells, showing gating for stromal cells (CD45<sup>-</sup>Ter119<sup>-</sup>CD31<sup>-</sup>), hematopoietic cells (CD45<sup>+</sup>) and endothelial cells (CD31<sup>+</sup>) (upper). Representative histogram of GFP expression in hematopoietic (CD45<sup>+</sup>), endothelial cells (CD31<sup>+</sup>) and stromal cells (CD45<sup>-</sup>Ter119<sup>-</sup>CD31<sup>-</sup>) from an PBS control (blue) and Sca1<sup>+</sup>GFP<sup>+</sup> IV transplanted mouse. Femurs were harvested one month after IV transplantation (lower).

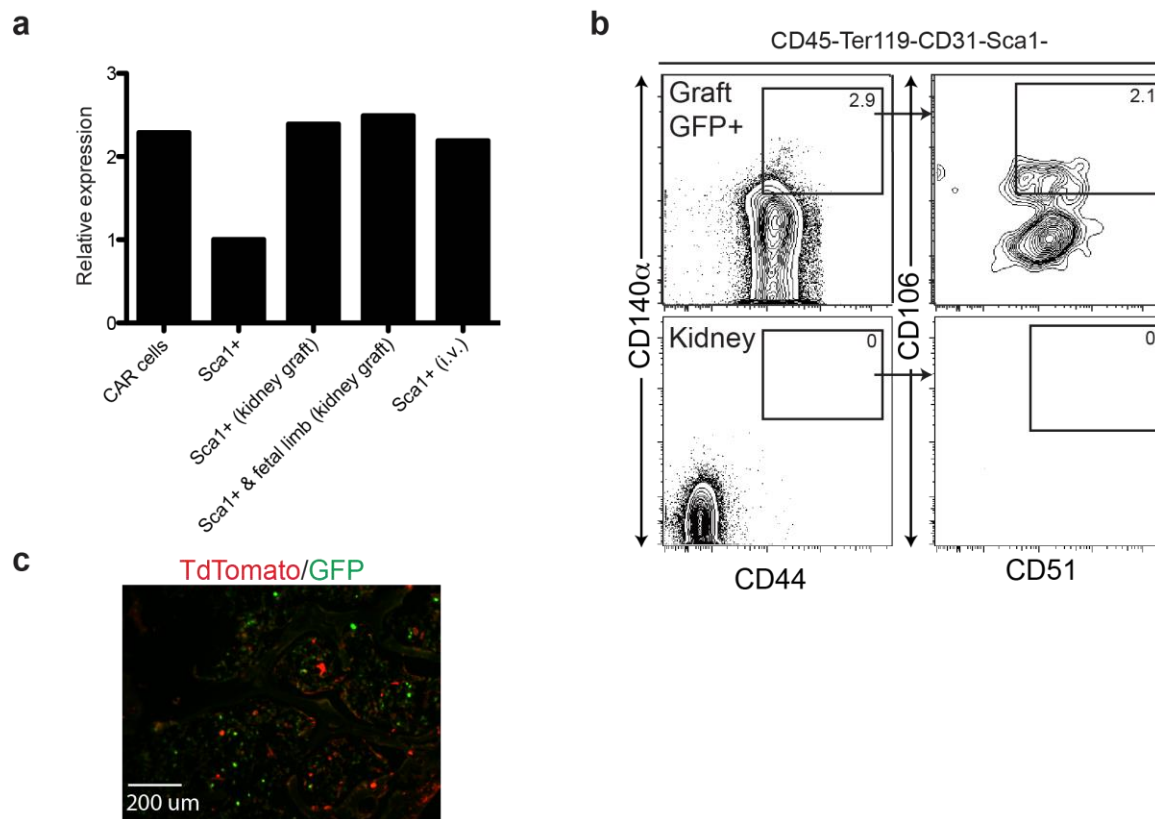

**Supplementary Figure 5. Sca1<sup>+</sup> progenitors and their progeny produced CXCL12 and do not fuse with host cells.** (a) Relative CXCL12 expression levels in sorted marrow CAR cells, Sca1<sup>+</sup> progenitors and GFP<sup>+</sup> cells that were derived from Sca1<sup>+</sup> progenitors after transplant and analysed by qRT-PCR normalized to GAPDH. (b) FACS analysis of phenotypically defined CAR cells in the kidney and in the graft arising from the direct transplant of GFP-labeled Sca1<sup>+</sup> progenitors under the kidney capsule one month after transplant. (c) GFP<sup>+</sup> Sca1<sup>+</sup> progenitors were intravenously injected into irradiated B6-TdTomato mice (600 rads). No donor-host fusions were detected one month later.

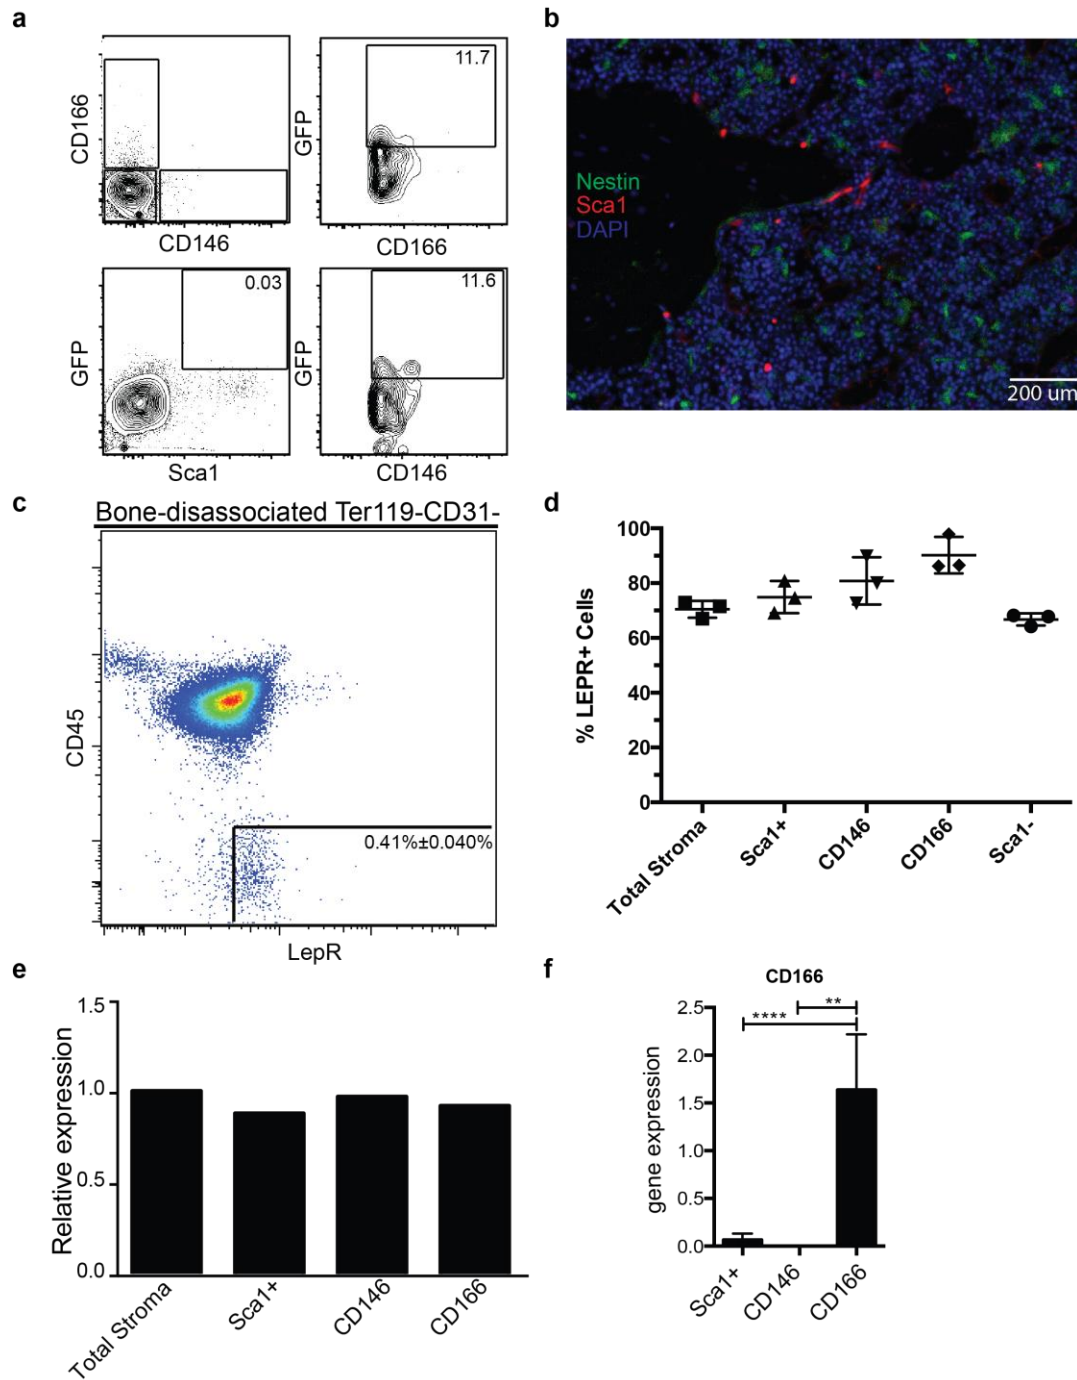

**Supplementary Figure 6. *Sca1*<sup>+</sup> progenitors expressed leptin receptor but little or no nestin.** (a) FACS analysis of bone-disassociated stromal cells (CD45<sup>-</sup>TER119<sup>-</sup>CD31<sup>-</sup>) from nestin-GFP mice. (b) Sections of femurs from nestin-GFP mice stained with an antibody to *Sca1*. (c) Representative FACs analysis of *LepR*<sup>+</sup> cells showing frequency in bone-disassociated live cells, n=3. (d) Frequency of *LepR*<sup>+</sup> cells in bone-disassociated total stroma, *Sca1*<sup>+</sup>, CD146<sup>+</sup>, CD166<sup>+</sup> and *Sca1*<sup>-</sup>, n=3. (e) Relative *LepR* receptor expression levels in sorted total bone-disassociated stroma, *Sca1*<sup>+</sup>, CD146<sup>+</sup> and CD166<sup>+</sup> progenitors analysed by qRT-PCR normalized to GAPDH. (f) Gene expression of CD166 in the sorted stromal cells based on single-cell Q-PCR (\*\*:P<0.005, \*\*\*P<0.0005), n=72, student's t-test).

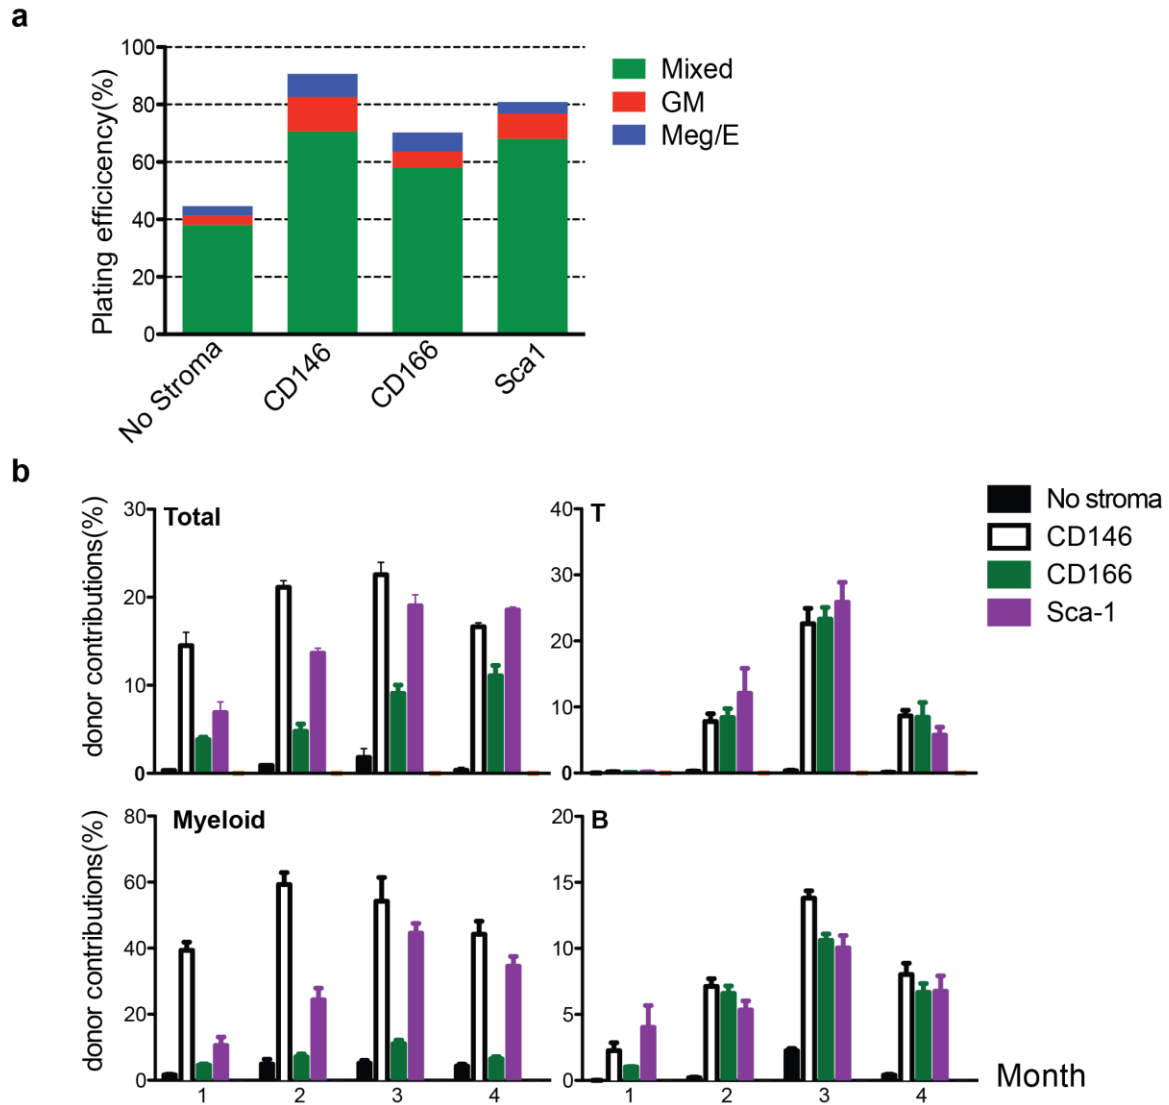

**Supplementary Figure 7. *In vitro* expanded bone-disassociated mesenchymal progenitors retain the ability to support hematopoiesis.** (a) Single cell colony forming efficiency of LT-HSCs co-cultured with different mesenchymal progenitors (n=180). (b) LT-HSCs were cultured with *in vitro* expanded mesenchymal progenitors for two days then tested in a competitive repopulation assay. The contribution of donor HSCs in the blood assayed one to four months after transplant (n=8).



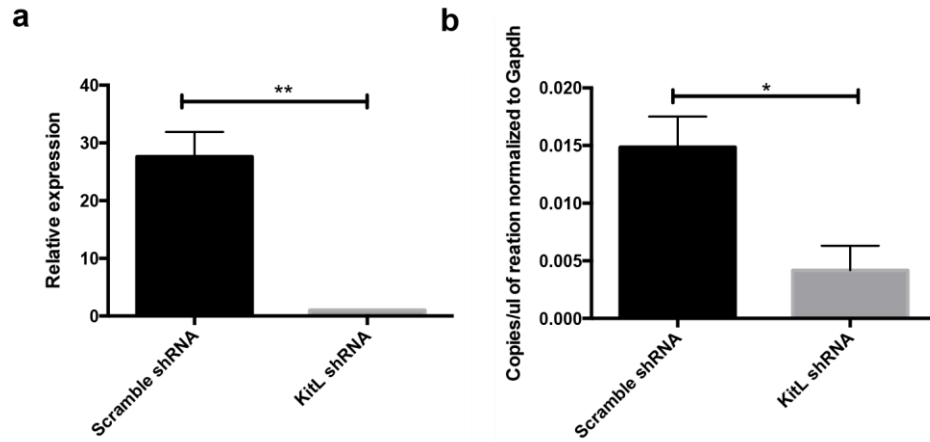

**Supplementary Figure 8. KitL shRNA effectively suppressed KitL expression in Sca1+ cells pre- and post transplantation.** (a) Relative expression of *KITL* in Sca1+ cells transduced with scramble or *KITL* shRNA, measured by standard Taqman assay qRT-PCR, prior to transplantation into the kidney capsule. (b) Copy number of *KITL* per ul of ddPCR reaction of Scramble or *KITL* shRNA transduced Sca1 cells 1 month after kidney capsule transplantation, (\*:P<0.05, \*\*P<0.005, technical triplicates, student's t-test)

**Supplementary Table 1. TaqMan probes used in current study.**

| Gene            | TaqMan Assay ID |
|-----------------|-----------------|
| ALP             | Mm00475834_m1   |
| Angpt1          | Mm00456503_m1   |
| Angpt2          | Mm00545822_m1   |
| BMP2            | Mm01340178_m1   |
| BMP4            | Mm00432087_m1   |
| BMP6            | Mm01332882_m1   |
| BMPR1 $\alpha$  | Mm00477650_m1   |
| CaSR            | Mm00443375_m1   |
| Cathepsin K     | Mm00484039_m1   |
| CD105           | Mm00468256_m1   |
| CD140 $\beta$   | Mm00435546_m1   |
| CD166           | Mm00711623_m1   |
| CD44            | Mm01277163_m1   |
| CDH11           | Mm00515466_m1   |
| CDH2            | Mm00483213_m1   |
| CXCL12          | Mm00445553_m1   |
| M-CSF           | Mm00432686_m1   |
| GM-CSF          | Mm01290062_m1   |
| G-CSF           | Mm00438334_m1   |
| DKK1            | Mm00438422_m1   |
| FGF2            | Mm00433287_m1   |
| FGF4            | Mm00438917_m1   |
| FGF7            | Mm00433291_m1   |
| FLT-3 L         | Mm00442801_m1   |
| GAPDH           | Mm99999915_g1   |
| ICAM1           | Mm00516023_m1   |
| IGF-1           | Mm00439560_m1   |
| IGFBP2          | Mm00492632_m1   |
| IL-1            | Mm01336189_m1   |
| IL-10           | Mm00439614_m1   |
| IL-3            | Mm00439631_m1   |
| IL-6            | Mm00446190_m1   |
| IL-7            | Mm01295803_m1   |
| Leptin receptor | Mm00440181_m1   |
| KITL            | Mm00442972_m1   |
| MMP9            | Mm00442991_m1   |
| NCAM1           | Mm00580526_m1   |
| Nestin          | Mm00450205_m1   |
| Osteocalcin     | Mm03413826_mH   |
| Osteopontin     | Mm00436767_m1   |
| Osterix         | Mm00504574_m1   |
| TGF $\beta$ 1   | Mm01178820_m1   |
| TIMP3           | Mm00441826_m1   |
| TNF $\alpha$    | Mm00443258_m1   |
| TPO             | Mm00456355_m1   |
| VCAM            | Mm01320970_m1   |
| VEGF            | Mm01281449_m1   |
| Wnt3a           | Mm00437337_m1   |
| Wnt5a           | Mm00437347_m1   |
